# Supplementary material for: Inhibition of Heme Oxygenase-1 Activity Enhances Wilms Tumor-1-Specific T-Cell Responses in Cancer Immunotherapy
Source: Int J Mol Sci. 2019 Jan 23;20(3):482. doi: 10.3390/ijms20030482 (PMC6387130; doi:10.3390/ijms20030482)
Supplement: Supplementary file 1 [file ijms-20-00482-s001.pdf]

# Inhibition of heme oxygenase-1 activity enhances Wilms tumor-1-specific T-cell responses in cancer immunotherapy

## Supplementary figures

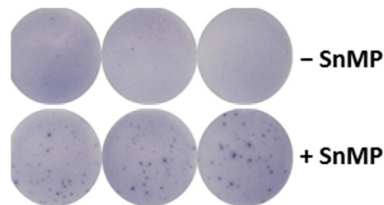

**Supplementary figure S1: Representative image of an IFN- $\gamma$  ELISpot analysis.** Isolated PBMCs of a donor were stimulated with ppWT1 with (bottom) or without SnMP (top). Each condition was performed in triplicates. Development of the ELISpot plate was done on the next day.

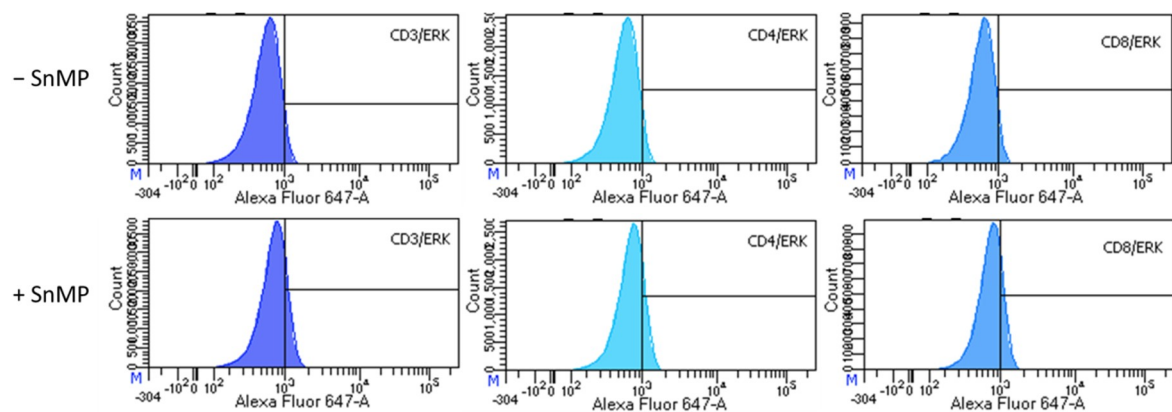

**Supplementary figure S2. FACS analysis of pERK1/2.** ppWT1-stimulated CD3<sup>+</sup>, CD4<sup>+</sup> and CD8<sup>+</sup> cells were analyzed for their expression of pERK1/2 in the presence or absence of SnMP. Illustrated are the data of one representative donor analyzed by flow cytometry.

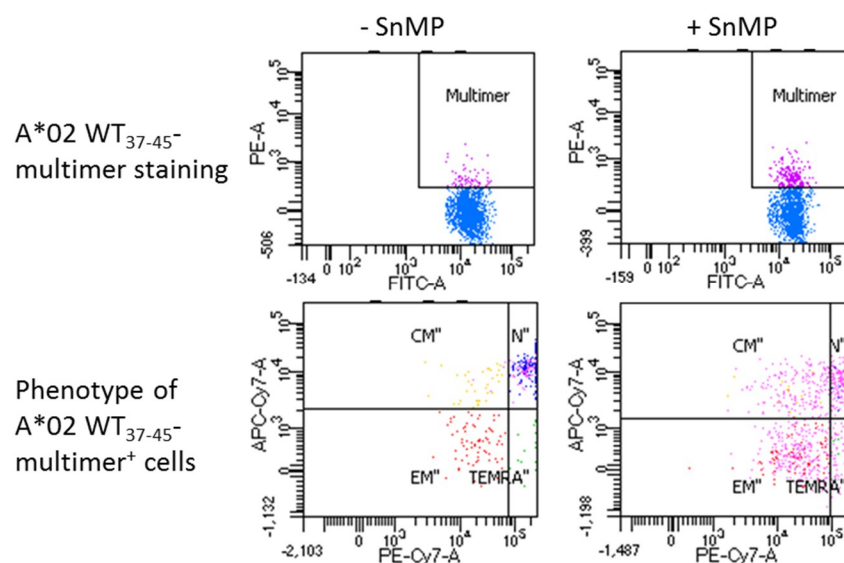

**Supplementary figure S3. FACS analysis of CD8<sup>+</sup> T cells labeled with the A\*02 WT<sub>37-45</sub>-restricted multimer.** Gating of the multimer<sup>+</sup> cells with or without stimulation of SnMP is shown on top and determination of the corresponding phenotype of the cells is shown in the bottom.
